# Supplementary material
Source: PubMed Central journal article supplement (PMC9343884)
Supplement: sj-pdf-1-brn-10.1177_10998004211069619.pdf [file sj-pdf-1-brn-10.1177_10998004211069619.pdf]

**Table S1. Metabolites Associated with Psychoneurological Symptoms Pre- Chemotherapy Cycle (T1)**

| Variable            | Metabolic pathways                         | Overlap size | Pathway size | <i>p-value</i> | Metabolites                                                                                                                                                                             |
|---------------------|--------------------------------------------|--------------|--------------|----------------|-----------------------------------------------------------------------------------------------------------------------------------------------------------------------------------------|
| Pain                | Fatty acid activation                      | 7            | 51           | .005           | Linoleic acid (all cis C18:2) n-6; Octadecadienoate (n-C18:2);(9E)-Octadecenoic acid; Hexadecanoate (n-C16: 0); Octadecenoate; Octadecatrienoic acid; all-cis-tetracosapentaenoate      |
|                     | Fatty acid metabolism                      | 5            | 29           | .005           | Octadecenoate (n-C18:1); Dimethylnonanoyl carnitine; Linoleic acid (all cis C18:2) n-6; Hexadecanoate (n-C16: 0); Octadecadienoate (n-C18:2) n-6                                        |
|                     | De novo fatty acid biosynthesis            | 5            | 35           | .013           | E857; Octadecatrienoic acid; (9E)-Octadecenoic acid; Linoleic acid all cis C18:2); Hexadecanoate (n-C16: 0)                                                                             |
|                     | Purine metabolism                          | 5            | 36           | .014           | N1-(5-Phospho-D-ribose) glycinamide; dATP; Deoxyuridine; Guanosine; 5-Amino-4-imidazolecarboxamide                                                                                      |
|                     | Xenobiotics metabolism                     | 5            | 45           | .037           | Naphthalene; 1,2-Dihydronaphthalene-1,2-diol; Hexadecanoate (n-C16: 0); E500; 4-Nitrophenyl sulfate                                                                                     |
| Fatigue             | Linoleate metabolism                       | 4            | 46           | .046           | E271; (9Z, 11E)- (13S)-13-Hydroperoxyoctadeca-9, 11-dienoic acid; E661; Lysophosphatidylcholine                                                                                         |
| Anxiety             | Tryptophan metabolism                      | 7            | 71           | .034           | Indole-3-acetaldehyde; 4-Hydroxy-2-quinolinecarboxylic acid; Indole-3-acetate; Xanthurenic acid; alpha-N-Phenylacetyl-L-glutamine; Formyl-5-hydroxykynurenamine; 5-Hydroxyindoleacetate |
|                     | Valine, leucine and isoleucine degradation | 3            | 15           | .017           | 3-methyl-2-oxobutanoate; Guanidinoacetate; L-leucine                                                                                                                                    |
| Depressive symptoms | 3-oxo-10R-octadecatrienoate beta-oxidation | 4            | 16           | .015           | 3-oxo-10(R)-hydroxy-octadeca-6E,8E,12Z-trienoate; 3(S),6(R)-dihydroxy-tetradec-8Z-enoate; 3-oxo-6(R)-hydroxy-tetradec-8-cis-enoate; 6(S)-hydroxy-tetradeca-2E,8Z-                       |

|                     |                       |   |    |      |                                                                                                                                                                                                                                        |
|---------------------|-----------------------|---|----|------|----------------------------------------------------------------------------------------------------------------------------------------------------------------------------------------------------------------------------------------|
|                     | Linoleate metabolism  | 7 | 46 | .028 | dienoate<br>(9Z,11E)-13-Hydroperoxyoctadeca-9,11-dienoic acid; E661; E902; 9.10-hydroxyoctadec-12(Z)-enoate;                                                                                                                           |
|                     | Tryptophan metabolism | 9 | 71 | .044 | Lysophosphatidylcholine; E730; E271<br>Xanthurenic acid; Indole-3-acetaldehyde; Nicotinate; E370; 4-hydroxy-2-quinolinecarboxylic acid; Indole-3-acetate; 5-Methoxyindoleacetate; Formyl-5-hydroxykynurenamine; 5-Hydroxyindoleacetate |
| Ordinal PNS cluster | Tryptophan metabolism | 9 | 71 | .002 | Indole-3-acetate; Alpha-N-phenylacetyl-L-glutamine; 4-Hydroxy-2-quinolinecarboxylic acid; N-Acetylserotonin; Xanthurenic acid; Nicotinate; Serotonin; E680; Formyl-5-hydroxykynurenamine                                               |

T1, pre-chemotherapy; PNS, psychoneurological symptoms

Overlap size means significant metabolite hits associated with the outcomes; metabolic pathways with an overlap size < 3 were removed from our findings. Pathway size means total number of KEGG metabolites in the pathways. Metabolites represent some examples of identified metabolites that are associated with outcome variables (PNS and the PNS cluster).

**Table S2. Metabolites Associated with Psychoneurological Symptoms Post-Chemotherapy Cycle (T2)**

| Variable | Metabolic pathways                                  | Overlap size | Pathway size | <i>p-value</i> | Metabolites                                                                                                                                                                                                                                                                         |
|----------|-----------------------------------------------------|--------------|--------------|----------------|-------------------------------------------------------------------------------------------------------------------------------------------------------------------------------------------------------------------------------------------------------------------------------------|
| Pain     | Glycerophospholipid metabolism                      | 12           | 60           | < .001         | (6Z,9Z,12Z)- Octadecatrienoic acid; Choline Phosphate; D-Galactose; Lysophosphatidylcholine; D-serine; Choline phosphate; Hydroxyeicosatetraenoate; Phosphatidylcholine; Acetylcholine; sn-Glycero-3-phosphocholine; 1-Alkyl-2-lyso-sn-glycero-3-phosphocholine; Dehydrosphinganine |
|          | Glycosphingolipid metabolism                        | 6            | 28           | .002           | Choline phosphate; D-Galactose; Hexadecanoate(n0C16: 0); E608; D-Serine; 3-Dehydrosphinganine                                                                                                                                                                                       |
|          | Fatty Acid Metabolism                               | 5            | 29           | .010           | Ocdcy, octadecadienoate (n-C18:2); Octadecanoate (n-C16: 0); Octadecanoate (n-C18: 0); Hexadecanoate(n-C16: 0); Dodecanoate (n-C12: 0)                                                                                                                                              |
|          | De novo fatty acid biosynthesis                     | 5            | 35           | .022           | (6Z,9Z,12Z)- Octadecatrienoic acid; Octadecanoate(n-C18: 0); Octadecanoate(n-C18: 0); Hexadecanoate(n-C16: 0); Dodecanoate(n-C12: 0)                                                                                                                                                |
|          | Vitamin B3 (nicotinate and nicotinamide) metabolism | 3            | 20           | .049           | N1-Methyl-4-pyridone-5-carboxamide; 1mncam, 1-Methylnicotinamide; Nicotinate                                                                                                                                                                                                        |
| Fatigue  | Xenobiotics metabolism                              | 7            | 45           | .003           | Dodecanoate (n-C12: 0); 1,2-Dihydronaphthalene-1,2-diol; E948; E219; 4-Nitrophenyl sulfate; 1-Nitronaphthalene; 1-Ntro-5,6-dihydroxy-dihydronaphthalene                                                                                                                             |
|          | Vitamin B6 (pyridoxine) metabolism                  | 3            | 10           | .005           | Pyridoxamine; E343; 4-Pyridoxate                                                                                                                                                                                                                                                    |
|          | Tryptophan metabolism                               | 8            | 71           | .012           | Formyl-5-hydroxykynurenamine; 5-Hydroxyindoleacetate; Nicotinate; N-Methyltryptamine; E356; D-Galactose; Tetrahydrobiopterin-4a-carbinolamine; 1-Ntro-5,6-dihydroxy-dihydronaphthalene                                                                                              |

|                     |                                                     |    |    |      |                                                                                                                                                                                                                                         |
|---------------------|-----------------------------------------------------|----|----|------|-----------------------------------------------------------------------------------------------------------------------------------------------------------------------------------------------------------------------------------------|
|                     | Drug metabolism - cytochrome P450                   | 3  | 22 | .045 | 5-Hydroxyindoleacetate; Didemethylcitalopram; E423                                                                                                                                                                                      |
| Anxiety             | Tryptophan metabolism                               | 11 | 71 | .013 | Nicotinate; 1,2-dehydrosalsolinol; 5-Hydroxy-L-tryptophan; Formylkynurenine; Formyl-5-hydroxykynurenamine; 5-Hydroxyindoleacetate; N-Methylserotonin; Indolepyruvate; E806; 1-Nitro-5,6-dihydroxy-dihydronaphthalene; N-Acetylserotonin |
|                     | Drug metabolism - cytochrome P450                   | 5  | 22 | .015 | Didemethylcitalopram; 5-hydroxyindoleacetate; 3-Carbamoyl-2-phenylpropionaldehyde; p-Hydroxyfelbamate; E423                                                                                                                             |
|                     | Glycerophospholipid metabolism                      | 9  | 60 | .026 | Choline phosphate; D-Serine; Tetrahydropteridine; sn-Glycero-3-phosphocholine; Arachidonic acid; sn-Glycero-3-phosphoethanolamine; Glycerol 3-phosphate; sn-glycero-3-Phospho-1-inositol; Diacylglycerol                                |
|                     | Urea cycle/amino group metabolism                   | 9  | 62 | .031 | O-methylhippurate; E132; (2R,4S)-2,4-Diaminopentanoate; L-Arginine; E673; N-Acetyl-L-glutamine; Agmatine; N-Methylphenylethanolamine; L-Proline                                                                                         |
|                     | Glycine, serine, alanine and threonine metabolism   | 8  | 54 | .035 | 2-Aminoacrylate; (2R,4S)-2,4-Diaminopentanoate; Betaine aldehyde; D-Serine; L-Arginine; E673; L-Threonine; E806                                                                                                                         |
|                     | Glycosphingolipid metabolism                        | 5  | 28 | .037 | N-Acetyl-D-galactosamine; Hexadecenal; D-Serine; Choline phosphate; Psychosine                                                                                                                                                          |
|                     | Vitamin B3 (nicotinate and nicotinamide) metabolism | 4  | 20 | .038 | L-Arginine; E806; Nicotinate; E673                                                                                                                                                                                                      |
| Depressive symptoms | Alanine and aspartate metabolism                    | 4  | 14 | .010 | L-Glutamate; E806; L-Arginine; L-Aspartate                                                                                                                                                                                              |
|                     | Glycerophospholipid metabolism                      | 10 | 60 | .009 | Tetrahydropteridine; D-Serine; 1-Alkyl-2-lyso-sn-glycero-3-phosphocholine; Phosphatidic acid; sn-Glycero-3-                                                                                                                             |

|                        |                                                        |   |    |       |                                                                                                                                                                                                                                                                                                                          |
|------------------------|--------------------------------------------------------|---|----|-------|--------------------------------------------------------------------------------------------------------------------------------------------------------------------------------------------------------------------------------------------------------------------------------------------------------------------------|
|                        | 3-oxo-10R-octadecatrienoate<br>beta-oxidation          | 4 | 16 | .016  | phosphocholine; sn-glycero-3-phospho-1-<br>inositol; Lysophosphatidylcholine; Choline<br>phosphate; Sterol; Diacylglycerol<br>3(S),6(R)-dihydroxy-tetradec-8Z-enoate;<br>3(S),8(R)-dihydroxy-6E,10Z-<br>hexadecadienoate; 8(S)-hydroxy-hexadeca-<br>2E,4E,6E,10Z-tetraenoate; 3(S),6(R)-<br>dihydroxy-tetradec-8Z-enoate |
|                        | Glycine, serine, alanine and<br>threonine metabolism   | 8 | 54 | 0.029 | Betaine aldehyde; (2R,4S)-2,4-<br>Diaminopentanoate; D-Serine; 2-<br>Aminoacrylate; L-Glutamate;<br>Isobutyrylglycine; L-Arginine; E806                                                                                                                                                                                  |
|                        | Selenoamino acid metabolism                            | 3 | 12 | 0.031 | E806; D-Serine; Deoxyguanosine                                                                                                                                                                                                                                                                                           |
|                        | Methionine and cysteine<br>metabolism                  | 7 | 50 | 0.048 | L-Glutamate; D-Serine; Thiosulfate; 2-<br>Aminoacrylate; E883; E806;<br>Deoxyguanosine                                                                                                                                                                                                                                   |
|                        | Vitamin B3 (nicotinate and<br>nicotinamide) metabolism | 4 | 20 | .033  | L-Glutamate; E806; L-Arginine; L-<br>Aspartate                                                                                                                                                                                                                                                                           |
| Ordinal PNS<br>cluster | Fatty acid metabolism                                  | 5 | 29 | .014  | Hexadecenoate(n-C16:1); Octadecenoate(n-<br>C18:1); Hexadecenoate(n-C16:0);<br>Dodecanoate(n-C12: 0);<br>Octadecadienoate(n-C18:2)                                                                                                                                                                                       |
|                        | Fatty acid activation                                  | 6 | 51 | .045  | Octadecenoate(n-C18:1); (6Z,9Z,12Z)-<br>Octadecatrienoic acid; Hexadecenoate(n-<br>C16:0); Butanoic acid; Octadecadienoate(n-<br>C18:2); Hexadecenoate(n-C16:1)                                                                                                                                                          |
|                        | Glycosphingolipid<br>metabolism                        | 4 | 28 | .044  | Ethanolamine phosphate; N-Acetyl-D-<br>galactosamine; Hexadecenoate(n-C16:0);<br>D-Serine                                                                                                                                                                                                                                |
|                        | 3-oxo-10R-octadecatrienoate<br>beta-oxidation          | 4 | 16 | .006  | 8(S)-hydroxy-hexadeca-4E,6E-10Z-<br>trienoate; 8(S)-hydroxy-hexadeca-<br>2E,4E,6E,10Z-tetraenoate; 3(S),6(R)-<br>dihydroxy-tetradec-8Z-enoate; E52                                                                                                                                                                       |
|                        | Tryptophan metabolism                                  | 8 | 71 | .033  | 4-(2-Amino-3-hydroxyphenyl)-2,4-<br>dioxobutanoate; Tetrahydrobiopterin-4a-<br>carbinolamine; N-Methyltryptamine; E356;                                                                                                                                                                                                  |

5-Hydroxy-L-tryptophan; 1-Nitro-5,6-dihydroxy-dihydronaphthalene; 5-Hydroxyindoleacetate; Formyl-5-hydroxykynurenamine

---

T1, pre-chemotherapy; PNS, psychoneurological symptoms

Overlap size means significant metabolite hits associated with the outcomes; metabolic pathways with an overlap size < 3 were removed from our findings. Pathway size means total number of KEGG metabolites in the pathways. Metabolites represent some examples of identified metabolites that are associated with outcome variables (PNS and the PNS cluster).
